# Supplementary material
Source: publisher site journal article supplement (https://www.dovepress.com/article/363916)

**Supplementary materials**

Original western blot image file:

| **MIF** | 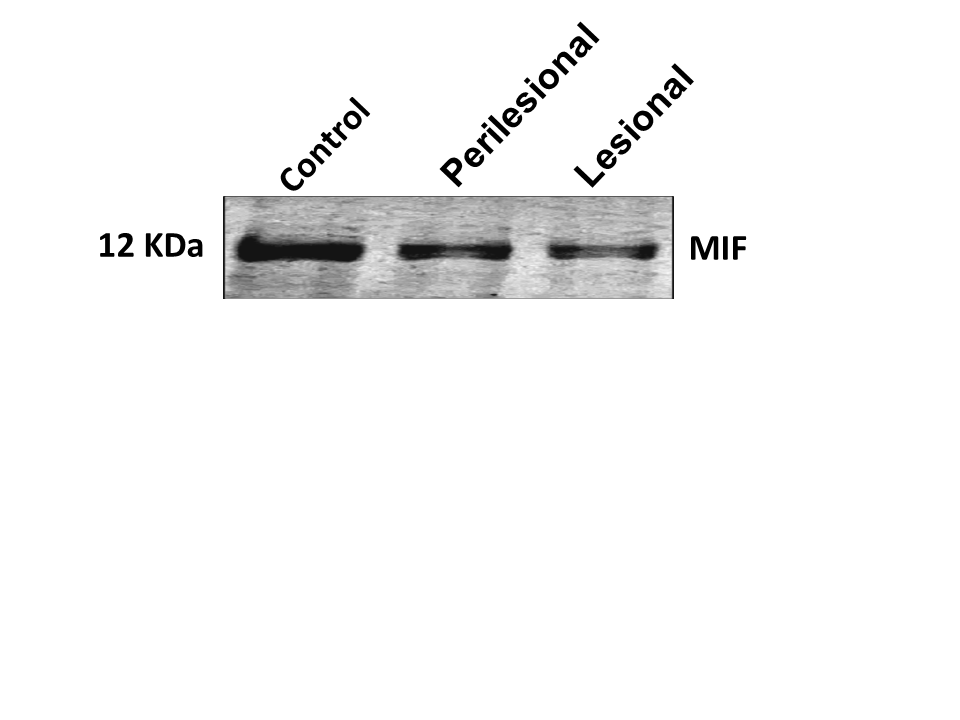 | 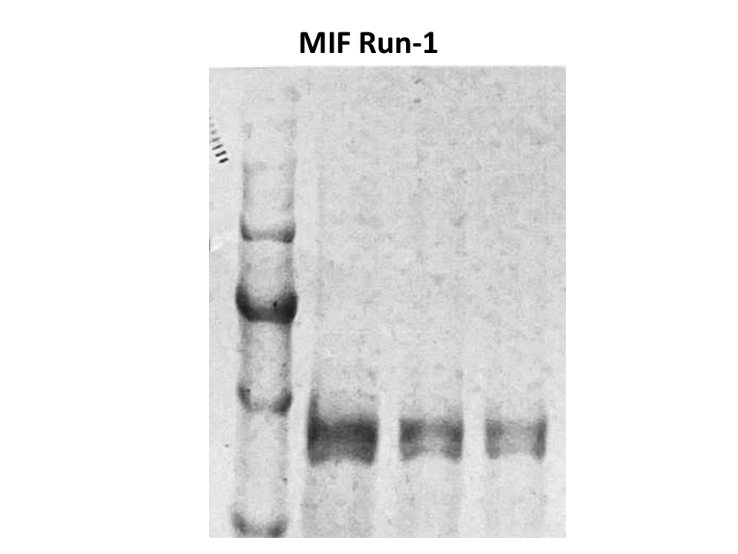 |
| --- | --- | --- |
| **MIF** | 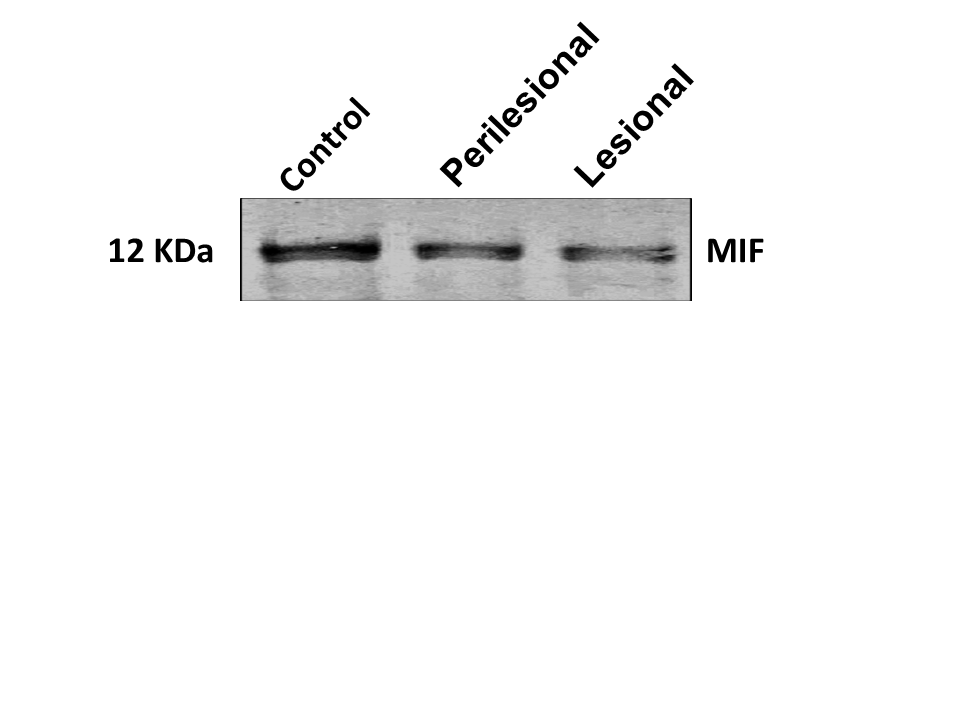 | 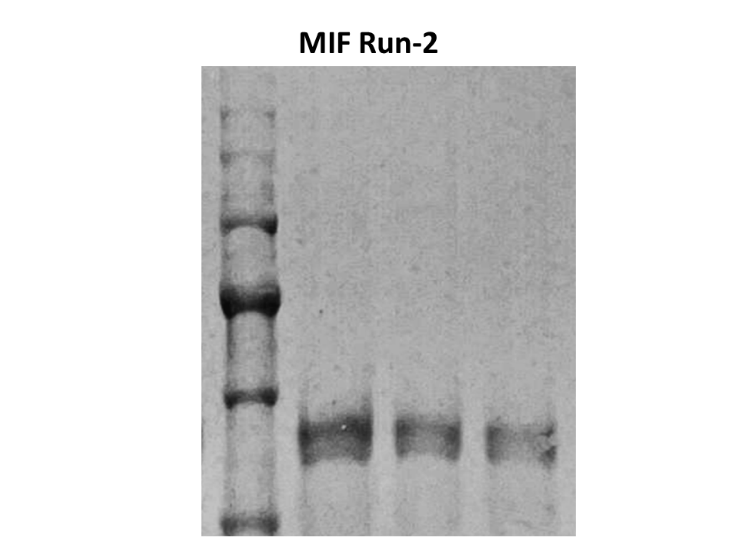 |
| **MIF** | 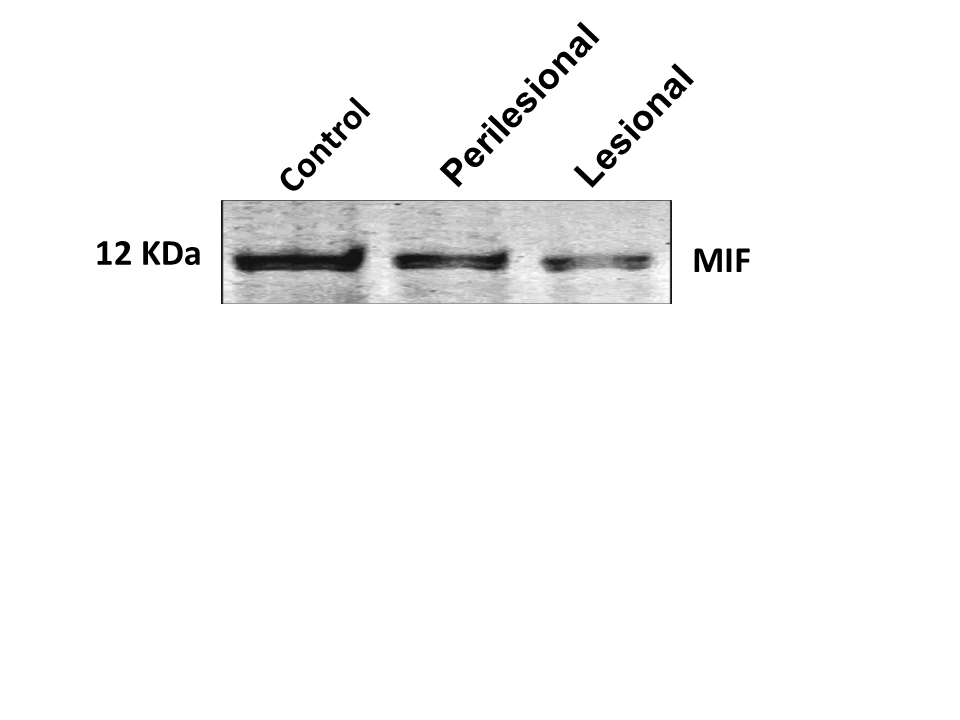 | 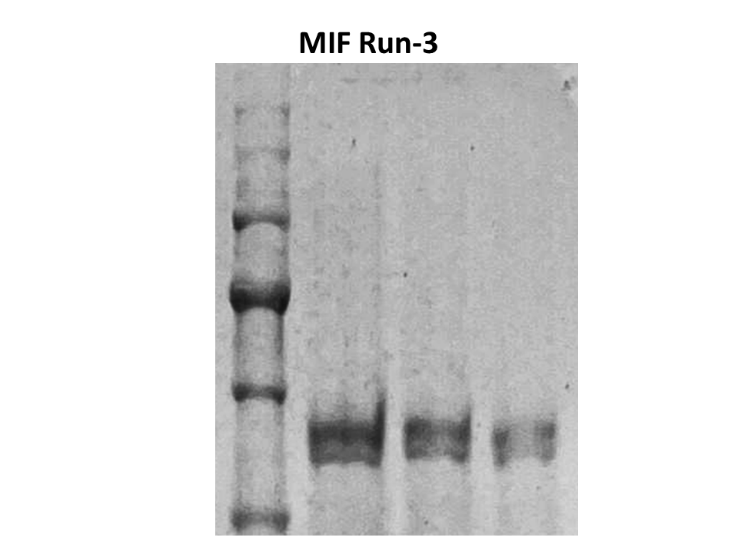 |
| **B-actin** | 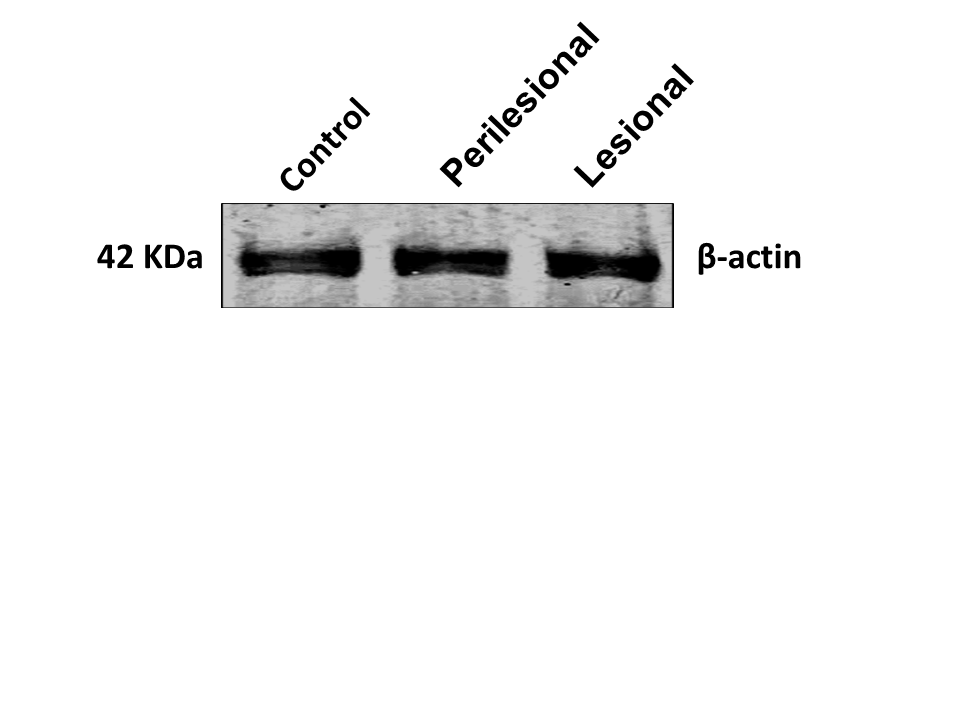 | 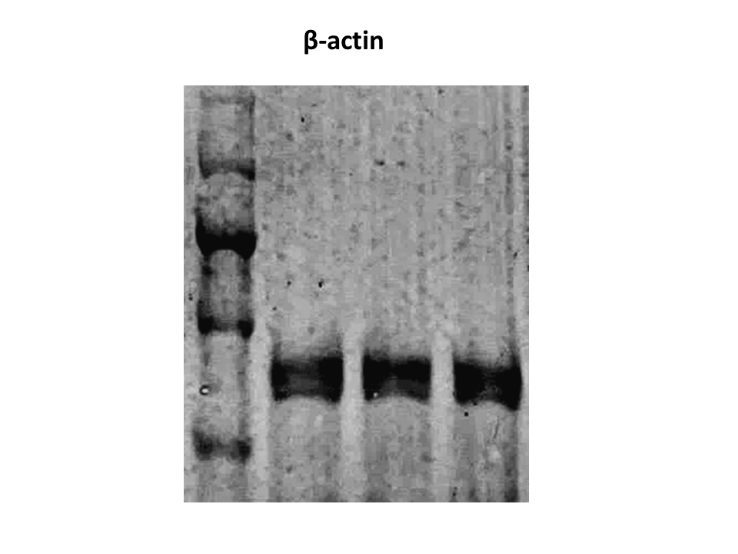 |
| **B-actin** | 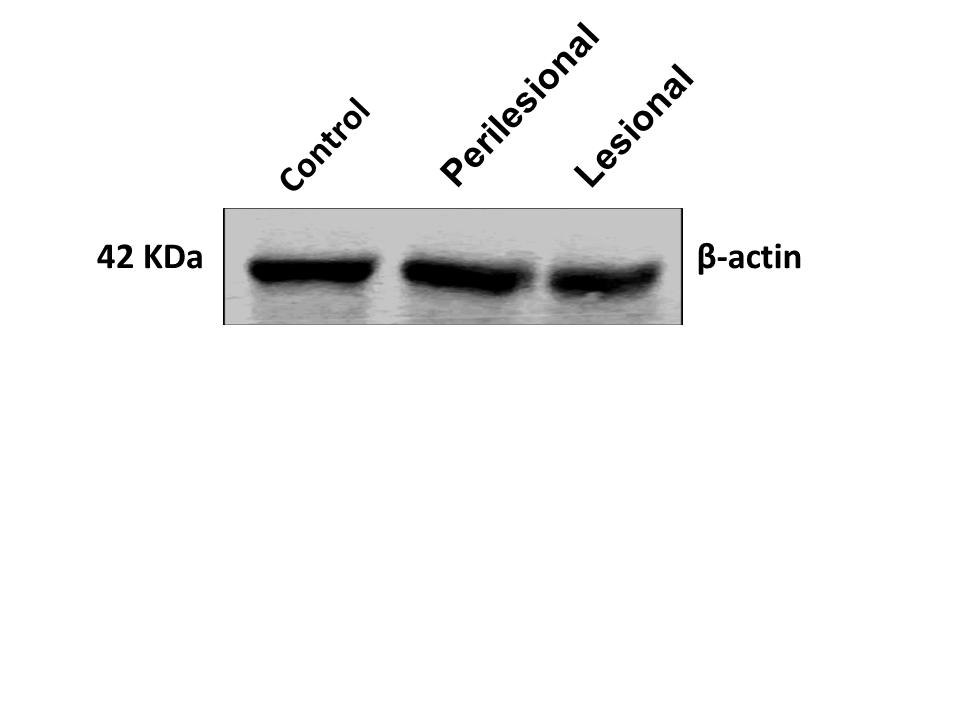 | 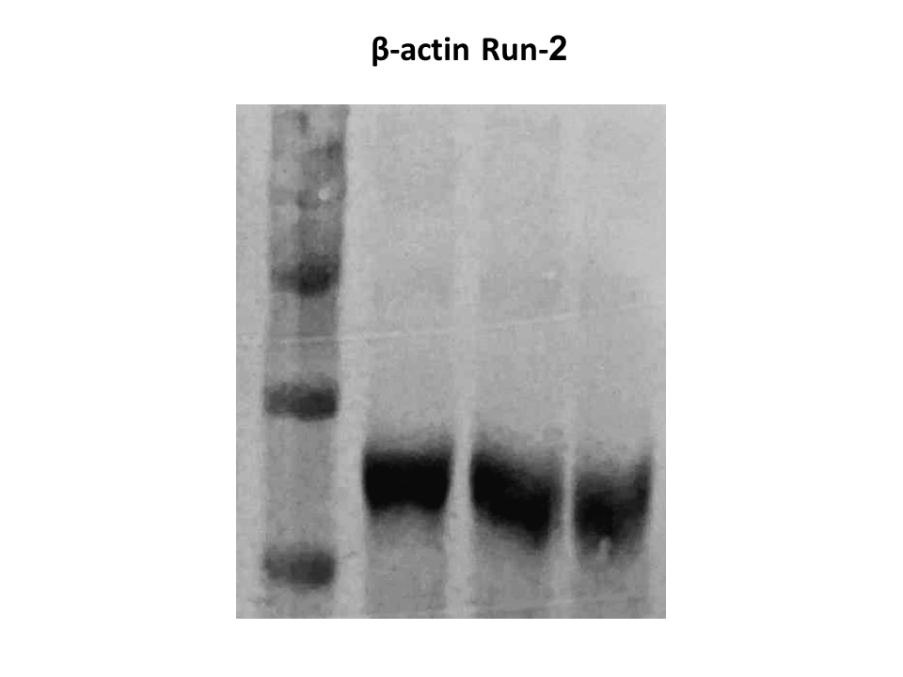 |
| **B-actin** | 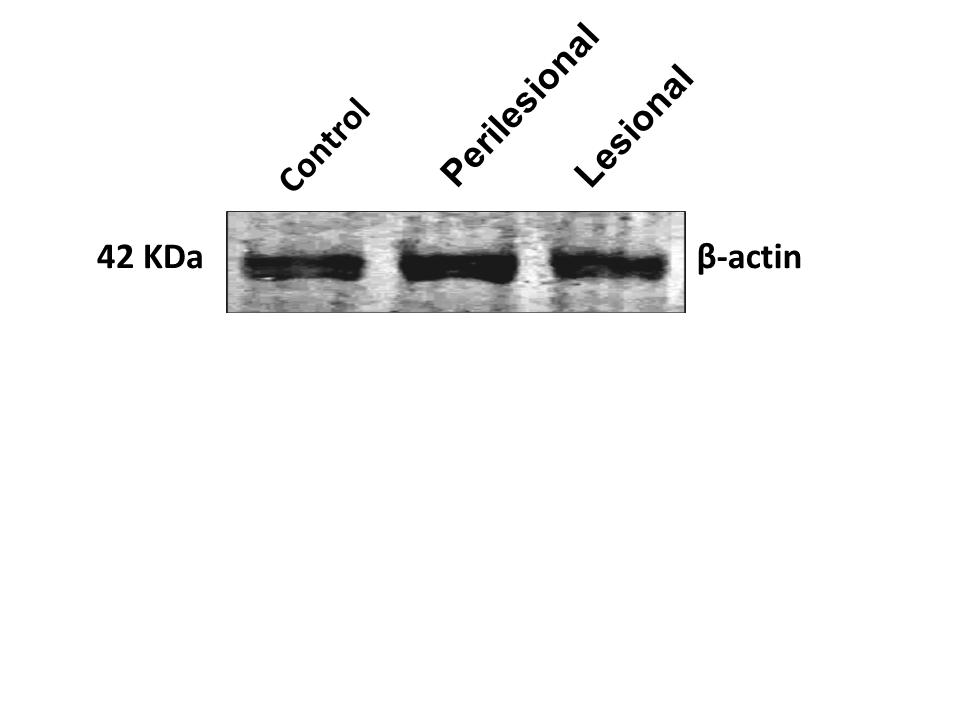 | 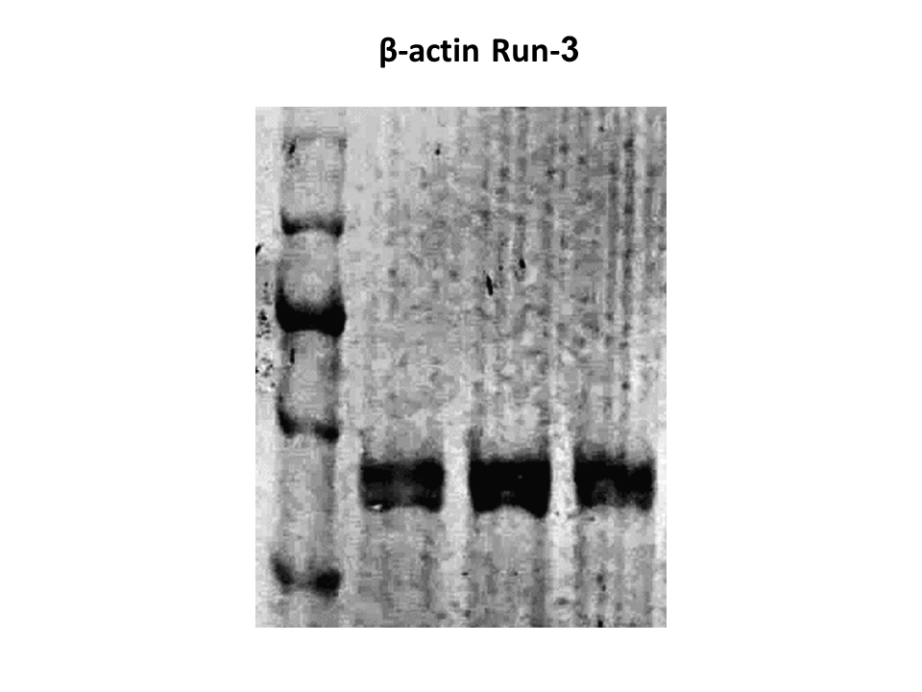 |

Supplement: Supplementary file 1 [file get_supplementary_file.php]
